# Supplementary material
Source: PubMed Central journal article supplement (PMC11448083)
Supplement: spectrum.00581-24-s0001.pdf [file spectrum.00581-24-s0001.pdf]

Supplementary Fig 1. Pairwise comparison of *rpsA* gene sequences from OS-12 CSF and vitreous fluid.

CLUSTAL O(1.2.4) multiple sequence alignment

```

OS-12-VF-rpsA      GTGACTTCGGTTTTCTGCCTGTACTTCCTTCTTCGTTTTTCACCCCTGTGCATGGGGG 60
OS-12-CSF-rpsA    ----- 0

OS-12-VF-rpsA      GGGGAGAGAGAGAGAAGTTTCGTTTCATCCTCGCACCCGTTGCGTTGCGGTGCGTGCAAG 120
OS-12-CSF-rpsA    ----- 0

OS-12-VF-rpsA      GACTGTGCTACAGTGCCGGCCGATGGGGACCGTGATCATCGCTCTTGATGGACCTGCAGG 180
OS-12-CSF-rpsA    ----- 0

OS-12-VF-rpsA      CTCTGGGAAGAGCAGCGTCTGTCTGCTCGCGTCTCGCCTTGGCGGCAATGTTTGAA 240
OS-12-CSF-rpsA    ----- 0

OS-12-VF-rpsA      CACGGTTCCTTCTACCGTGCATTTACCCTCGCCGATGCGTAGGGTATCGGAGTTGGC 300
OS-12-CSF-rpsA    ----- 0

OS-12-VF-rpsA      CGTGCAAGCGTGCTCTCCTTCTCCGACCCGTGATGCGCGGTGCGGTGCGCGCTGTTC 360
OS-12-CSF-rpsA    ----- 0

OS-12-VF-rpsA      ACACGCAACAAATCTGGACACATCATATGCTCCTCTGACGGCCAGAGAAGGTTGCACT 420
OS-12-CSF-rpsA    ----- 0

OS-12-VF-rpsA      TTTTGATGAAGCGTATTGGGTTTCGTTTGGCGCACAGTTGCGCTTCTTATCGTGCGGG 480
OS-12-CSF-rpsA    ----- 0

OS-12-OVF-rpsA     TGTGATGTACGTGGGCGAAGAGAACGTGGAGTCACTGCTGCGTTCGGATGAGGTGGAGTC 540
OS-12-CSF-rpsA    ----- 0

OS-12-VF-rpsA      GGCAGTCTCGTACTTCGCGGCAATGCCGGCTATTCGGGCAATTATGACGGGGAAGATCCG 600
OS-12-CSF-rpsA    ----- 0

OS-12-VF-rpsA      GTCGGCCGTTTGTGGTGC GCGGGTAGTTTGTGAAGGGCGTGATCTAACGACGGTTGTGTT 660
OS-12-CSF-rpsA    -----GTGCGCGGGTAGTTTGTGAAGGGCGTGATCTAACGACGGTTGTGTT 46
                      *****

OS-12-VF-rpsA      TGTGGATGCGGACTTGAAGTGTACCTTGACGCTTCTATTGAGGCGGTGTGGCGCGTGC 720
OS-12-CSF-rpsA    TGTGGATGCGGACTTGAAGTGTACCTTGACGCTTCTATTGAGGCGGTGTGGCGCGTGC 106
                      *****

OS-12-VF-rpsA      TTGGGCGCAGGGAACGAGCCGGTTATCGAAGCAGGAACTCGAGCAGCGCATGCGCGCGCG 780
OS-12-CSF-rpsA    TTGGGCGCAGGGAACGAGCCGGTTATCGAAGCAGGAACTCGAGCAGCGCATGCGCGCGCG 166
                      *****

OS-12-OF-rpsA      TGACGCACACGACAGGGCGCGCACCCGTGGGGGGCTCAGGTGTGCGCCTGATGCGCTGTA 840
OS-12-CSF-rpsA    TGACGCACACGACAGGGCGCGCACCCGTGGGGGGCTCAGGTGTGCGCCTGATGCGCTGTA 226
                      *****

OS-12-VF-rpsA      CGTGGATACTTCTTGCTTGACCATTTGAGGAGTTTGTGAAAGAATCGCGCGGAGGCGCA 900
OS-12-CSF-rpsA    CGTGGATACTTCTTGCTTGACCATTTGAGGAGTTTGTGAAAGAATCGCGCGGAGGCGCA 286
                      *****

OS-12-OF-rpsA      CCGCAGAGCTTTGTGGGAGGAGAGCGTTCAGTGGAATAATCAGGAGGGGAAGGGTACACC 960
OS-12-CSF-rpsA    CCGCAGAGCTTTGTGGGAGGAGAGCGTTCAGTGGAATAATCAGGAGGGGAAGGGTACACC 346
                      *****

OS-12-VF-rpsA      ATTGGTGCCGCGGACAGCTGCAGGAGCGGTATTCGTTTGGAGCTCCGGAACCTGGTTCTGT 1020
OS-12-CSF-rpsA    ATTGGTGCCGCGGACAGCTGCAGGAGCGGTATTCGTTTGGAGCTCCGGAACCTGGTTCTGT 406
                      *****

```

|                |                                                                          |      |
|----------------|--------------------------------------------------------------------------|------|
| OS-12-VF-rpsA  | TAGGATGGGGACGGTGGTTTCAGGTTAATGCGGGGACGGTGTTTGTAGACATCGGGGGAAA            | 1080 |
| OS-12-CSF-rpsA | TAGGATGGGGACGGTGGTTTCAGGTTAATGCGGGGACGGTGTTTGTAGACATCGGGGGAAA<br>*****   | 466  |
| OS-12-VF-rpsA  | ATCTGAAGGGCGCGTTCAGTGGAAAGAGTTTGAGGCGCCGCCGAAGGCAGGGGATGGCGT             | 1140 |
| OS-12-CSF-rpsA | ATCTGAAGGGCGCGTTCAGTGGAAAGAGTTTGAGGCGCCGCCGAAGGCAGGGGATGGCGT<br>*****    | 526  |
| OS-12-VF-rpsA  | TCGGGTGTATGTGGAGCGGTGACGCCCTTATGGCCCTGAGCTTTCGAAGACGAAGGCCGA             | 1200 |
| OS-12-CSF-rpsA | TCGGGTGTATGTGGAGCGGTGACGCCCTTATGGCCCTGAGCTTTCGAAGACGAAGGCCGA<br>*****    | 586  |
| OS-6-VF-rpsA   | TCGCTTGGGTTTGAAAGTTAAGTTACGTGATGCGGAGCGAGACGGGACTCCGGTTGAGGG             | 1260 |
| OS-6-CSF-rpsA  | TCGCTTGGGTTTGAAAGTTAAGTTACGTGATGCGGAGCGAGACGGGACTCCGGTTGAGGG<br>*****    | 646  |
| OS-12-VF-rpsA  | GAGGATCGTCCGTCTAACGGAAGAAGAGTGGTTTTGAAGTGGACTTGGGTGCGGGGAT               | 1320 |
| OS-12-CSF-rpsA | GAGGATCGTCCGTCTAACGGAAGAAGAGTGGTTTTGAAGTGGACTTGGGTGCGGGGAT<br>*****      | 706  |
| OS-12-VF-rpsA  | GATGGCCTTTTTACCTATCAGCCAGTCGGACTGTCAGAAAGTCGACGCGCCTGAGAGTCT             | 1380 |
| OS-12-CSF-rpsA | GATGGCCTTTTTACCTATCAGCCAGTCGGACTGTCAGAAAGTCGACGCGCCTGAGAGTCT<br>*****    | 766  |
| OS-12-VF-rpsA  | CATTGGGCTTACGTCTAAGTTCTATATCGAGCGTATATCCCAAAGCAAACAGCATCGCGG             | 1440 |
| OS-12-CSF-rpsA | CATTGGGCTTACGTCTAAGTTCTATATCGAGCGTATATCCCAAAGCAAACAGCATCGCGG<br>*****    | 826  |
| OS-12-VF-rpsA  | CAACGACAACATGTGCATTAATCGACGCGGTTATTTGGAGGAGCGTGC CGCGG CAGGCGCG          | 1500 |
| OS-12-CSF-rpsA | CAACGACAACATGTGCATTAATCGACGCGGTTATTTGGAGGAGCGTGC CGCGG CAGGCGCG<br>***** | 886  |
| OS-12-VF-rpsA  | CGAGGAGTTCTTCAATTCGGTTCATATGAAGATTCGGTATCCGGAGTGGTTAAGAGCTT              | 1560 |
| OS-12-CSF-rpsA | CGAGGAGTTCTTCAATTCGGTTCATATGAAGATTCGGTATCCGGAGTGGTTAAGAGCTT<br>*****     | 946  |
| OS-12-VF-rpsA  | TACGAGTTTGGTGCTTTCATTGACTTGGGCGGTTTCGATGGCCTCCTGCATGTGAATGA              | 1620 |
| OS-12-CSF-rpsA | TACGAGTTTGGTGCTTTCATTGACTTGGGCGGTTTCGATGGCCTCCTGCATGTGAATGA<br>*****     | 1006 |
| OS-12-VF-rpsA  | CATGAGCTGGGGGCACGTGGCGCGGCCGCGGAGTTTGTGAAGAAAGGACAAACCATTGA              | 1680 |
| OS-12-CSF-rpsA | CATGAGCTGGGGGCACGTGGCGCGGCCGCGGAGTTTGTGAAGAAAGGACAAACCATTGA<br>*****     | 1066 |
| OS-12-VF-rpsA  | GTTGAAGGTTATCCGCCGATCAGGCGGAGAAGCGTATCAATTTGTCCCTGAAGCATT                | 1740 |
| OS-12-CSF-rpsA | GTTGAAGGTTATCCGCCGATCAGGCGGAGAAGCGTATCAATTTGTCCCTGAAGCATT<br>*****       | 1126 |
| OS-12-VF-rpsA  | TCAGCCGATCCGTGGCTGAGTTTGAACAAGTTCGGCGTGAATGATGTGGTCAAGGG                 | 1800 |
| OS-12-CSF-rpsA | TCAGCCGATCCGTGGCTGAGTTTGAACAAGTTCGGCGTGAATGATGTGGTCAAGGG<br>*****        | 1186 |
| OS-12-VF-rpsA  | GCGTGTAAAGAAATCGCTGATTTCCGGTGCCTCATTGAACCTGCTGAGGGTATCGAGGG              | 1860 |
| OS-12-CSF-rpsA | GCGTGTAAAGAAATCGCTGATTTCCGGTGCCTCATTGAACCTGCTGAGGGTATCGAGGG<br>*****     | 1246 |
| OS-12-VF-rpsA  | GCTTGCGCATATTAGTGAGTTCAGTGGGTAAAGAAAACGAGTAAACCCAGTGACATGGT              | 1920 |
| OS-12-CSF-rpsA | GCTTGCGCATATTAGTGAGTTCAGTGGGTAAAGAAAACGAGTAAACCCAGTGACATGGT<br>*****     | 1306 |
| OS-12-VF-rpsA  | TAAATTTGGGGATGAAGTGGAGTGTATGATCCTCGGGTATGATATCCAGGCGGGACGGGT             | 1980 |
| OS-12-CSF-rpsA | TAAATTTGGGGATGAAGTGGAGTGTATGATCCTCGGGTATGATATCCAGGCGGGACGGGT<br>*****    | 1366 |
| OS-12-VF-rpsA  | GTCTCTGGGGCTTAAGCAGGTAACGGCGAATCCTTGGGAGGAAATAGAGGCTCGTTATCC             | 2040 |
| OS-12-CSF-rpsA | GTCTCTGGGGCTTAAGCAGGTAACGGCGAATCCTTGGGAGGAAATAGAGGCTCGTTATCC<br>*****    | 1426 |
| OS-12-VF-rpsA  | TGTGGGTGCGCGCTTACGCGCGTATCGTAAAGGTTACGAACGCAGGTGCTTTCATTGA               | 2100 |
| OS-12-CSF-rpsA | TGTGGGTGCGCGCTTACGCGCGTATCGTAAAGGTTACGAACGCAGGTGCTTTCATTGA<br>*****      | 1486 |

```

*****
OS-12-VF-rpsA      AATGGAAGAGGGAATAGACGGCTTTTTCACGTCGATGATCTGTCCTGGGTTAAGCGGAC 2160
OS-12-CSF-rpsA    AATGGAAGAGGGAATAGACGGCTTTTTCACGTCGATGATCTGTCCTGGGTTAAGCGGAC 1546
*****

OS-12-VF-rpsA      GCGTCCTGCAGACCATGAGCTTGAGGTAGGTAAGAAATCGAGTGTATGGTTATCGAGTG 2220
OS-12-CSF-rpsA    GCGTCCTGCAGACCATGAGCTTGAGGTAGGTAAGAAATCGAGTGTATGGTTATCGAGTG 1606
*****

OS-12-VF-rpsA      TGATCCGCAAGCGCGCCGTATTCCGGCTTGGTGTTAAGCAGTTGAGCGACAATCCGTGGCA 2280
OS-12-CSF-rpsA    TGATCCGCAAGCGCGCCGTATTCCGGCTTGGTGTTAAGCAGTTGAGCGACAATCCGTGGCA 1666
*****

OS-12-VF-rpsA      GGTGTTTGCGAACGCCTATGGGGTAGGGTCTACCGTGAGGGGGAAGTATCTTCCGTGAC 2340
OS-12-CSF-rpsA    GGTGTTTGCGAACGCCTATGGGGTAGGGTCTACCGTGAGGGGGAAGTATCTTCCGTGAC 1726
*****

OS-12-VF-rpsA      GGATTTTGGGATTTTCGTGCGTGTCCCGGTGGCGTTGAGGGGCTTGTTCGCAAGCAGCA 2400
OS-12-CSF-rpsA    GGATTTTGGGATTTTCGTGCGTGTCCCGGTGGCGTTGAGGGGCTTGTTCGCAAGCAGCA 1786
*****

OS-12-VF-rpsA      TCTGGTTGAGAATCGGGATGGGGATCCGGGTGAAGCGCTAAGGAAATACGCAGTGGGGGA 2460
OS-12-CSF-rpsA    TCTGGTTGAGAATCGGGATGGGGATCCGGGTGAAGCGCTAAGGAAATACGCAGTGGGGGA 1846
*****

OS-12-VF-rpsA      CCGGGTCAAGGCAGTGATCGTAGATATGAACGTGAAGGACAGGAAGGTTGCTTTTTCTGT 2520
OS-12-CSF-rpsA    CCGGGTCAAGGCAGTGATCGTAGATATGAACGTGAAGGACAGGAAGGTTGCTTTTTCTGT 1906
*****

OS-12-VF-rpsA      TAGAGACTATCAAAGAAAGGTACAGCGTGACGAGCTTCTCGGTATATGTCCGCCCCCGG 2580
OS-12-CSF-rpsA    TAGAGACTATCAAAGAAAGGTACAGCGTGACGAGCTTCTCGGTATATGTCCGCCCCCGG 1966
*****

OS-12-VF-rpsA      GGGGGAGGACGAAGGCTCGTTTACGCTCGGTGATTTGATGAGGCAAACGTCTGAAAAGTG 2640
OS-12-CSF-rpsA    GGGGGAGGACGAAGGCTCGTTTACGCTCGGTGATTTGATGAGGCAAACGTCTGAAAAGTG 2026
*****

OS-12-VF-rpsA      A 2641
OS-12-CSF-rpsA    A 2027
*
```
