# Supplementary material
Source: PubMed Central journal article supplement (PMC11448083)
Supplement: spectrum.00581-24-s0002.pdf [file spectrum.00581-24-s0002.pdf]

Supplementary Fig 2. Multiple sequence alignment of the 16S rRNA sequences from *T. pallidum* ocular syphilis strains OS-4B, OS-12VF, OS-18VF, and the Nichols reference sequence (NC\_021490.2).

CLUSTAL O(1.2.4) multiple sequence alignment

|                       |                                                              |     |
|-----------------------|--------------------------------------------------------------|-----|
| TP_TPANICr0001_16RNA1 | TCGAACGGCAAGGAAGCGAATTTTCGTTTCTCTAGAGTGGCGGACTGGTGAGTAACGCGT | 60  |
| OS-18-VID15_16sRNA    | TCGAACGGCAAGGAAGCGAATTTTCGTTTCTCTAGAGTGGCGGACTGGTGAGTAACGCGT | 60  |
| OS-4_16sRNA           | TCGAACGGCAAGGAAGCGAATTTTCGTTTCTCTAGAGTGGCGGACTGGTGAGTAACGCGT | 60  |
| OS-12-VID15_16sRNA    | TCGAACGGCAAGGAAGCGAATTTTCGTTTCTCTAGAGTGGCGGACTGGTGAGTAACGCGT | 60  |
|                       | *****                                                        |     |
| TP_TPANICr0001_16RNA1 | GGGTAATCTGCCTTTGAGATGGGGATAGCCTCTAGAAATAGGGGGTAATACCGAATACGC | 120 |
| OS-18-VID15_16sRNA    | GGGTAATCTGCCTTTGAGATGGGGATAGCCTCTAGAAATAGGGGGTAATACCGAATACGC | 120 |
| OS-4_16sRNA           | GGGTAATCTGCCTTTGAGATGGGGATAGCCTCTAGAAATAGGGGGTAATACCGAATACGC | 120 |
| OS-12-VID15_16sRNA    | GGGTAATCTGCCTTTGAGATGGGGATAGCCTCTAGAAATAGGGGGTAATACCGAATACGC | 120 |
|                       | *****                                                        |     |
| TP_TPANICr0001_16RNA1 | TCTTTTGGACGTAGGTCTTTGAGAGGAAAGGGGCTGCGGCCTCGCTCAGAGATGAGCCTG | 180 |
| OS-18-VID15_16sRNA    | TCTTTTGGACGTAGGTCTTTGAGAGGAAAGGGGCTGCGGCCTCGCTCAGAGATGAGCCTG | 180 |
| OS-4_16sRNA           | TCTTTTGGACGTAGGTCTTTGAGAGGAAAGGGGCTGCGGCCTCGCTCAGAGATGAGCCTG | 180 |
| OS-12-VID15_16sRNA    | TCTTTTGGACGTAGGTCTTTGAGAGGAAAGGGGCTGCGGCCTCGCTCAGAGATGAGCCTG | 180 |
|                       | *****                                                        |     |
| TP_TPANICr0001_16RNA1 | CGACCCATTAGCTTGTGGTGGGGTAATGGCCTACCAAGGCGTCGATGGGTATCCGACCT  | 240 |
| OS-18-VID15_16sRNA    | CGACCCATTAGCTTGTGGTGGGGTAATGGCCTACCAAGGCGTCGATGGGTATCCGACCT  | 240 |
| OS-4_16sRNA           | CGACCCATTAGCTTGTGGTGGGGTAATGGCCTACCAAGGCGTCGATGGGTATCCGACCT  | 240 |
| OS-12-VID15_16sRNA    | CGACCCATTAGCTTGTGGTGGGGTAATGGCCTACCAAGGCGTCGATGGGTATCCGACCT  | 240 |
|                       | *****                                                        |     |
| TP_TPANICr0001_16RNA1 | GAGAGGGTGACCGGACACACTGGGACTGAGATACGGCCAGACTCCTACGGGAGGCAGCA  | 300 |
| OS-18-VID15_16sRNA    | GAGAGGGTGACCGGACACACTGGGACTGAGATACGGCCAGACTCCTACGGGAGGCAGCA  | 300 |
| OS-4_16sRNA           | GAGAGGGTGACCGGACACACTGGGACTGAGATACGGCCAGACTCCTACGGGAGGCAGCA  | 300 |
| OS-12-VID15_16sRNA    | GAGAGGGTGACCGGACACACTGGGACTGAGATACGGCCAGACTCCTACGGGAGGCAGCA  | 300 |
|                       | *****                                                        |     |
| TP_TPANICr0001_16RNA1 | GCTAAGAATATTCGCAATGGGGCAAAGCCTGACGGAGCGACACCGCGTGGATGAGGAAG  | 360 |
| OS-18-VID15_16sRNA    | GCTAAGAATATTCGCAATGGGGCAAAGCCTGACGGAGCGACACCGCGTGGATGAGGAAG  | 360 |
| OS-4_16sRNA           | GCTAAGAATATTCGCAATGGGGCAAAGCCTGACGGAGCGACACCGCGTGGATGAGGAAG  | 360 |
| OS-12-VID15_16sRNA    | GCTAAGAATATTCGCAATGGGGCAAAGCCTGACGGAGCGACACCGCGTGGATGAGGAAG  | 360 |
|                       | *****                                                        |     |
| TP_TPANICr0001_16RNA1 | GTCGAAAGATTGTAAGTTCTTTTGGCCGACGAAGAATGAGGACGGGAGGGAATGCCCGTT | 420 |
| OS-18-VID15_16sRNA    | GTCGAAAGATTGTAAGTTCTTTTGGCCGACGAAGAATGAGGACGGGAGGGAATGCCCGTT | 420 |
| OS-4_16sRNA           | GTCGAAAGATTGTAAGTTCTTTTGGCCGACGAAGAATGAGGACGGGAGGGAATGCCCGTT | 420 |
| OS-12-VID15_16sRNA    | GTCGAAAGATTGTAAGTTCTTTTGGCCGACGAAGAATGAGGACGGGAGGGAATGCCCGTT | 420 |
|                       | *****                                                        |     |
| TP_TPANICr0001_16RNA1 | TGATGACGGTAGTCGTGCGAATAAGCCCCGGCTAATTACGTGCCAGCAGCCGCGGTAACA | 480 |
| OS-18-VID15_16sRNA    | TGATGACGGTAGTCGTGCGAATAAGCCCCGGCTAATTACGTGCCAGCAGCCGCGGTAACA | 480 |
| OS-4_16sRNA           | TGATGACGGTAGTCGTGCGAATAAGCCCCGGCTAATTACGTGCCAGCAGCCGCGGTAACA | 480 |
| OS-12-VID15_16sRNA    | TGATGACGGTAGTCGTGCGAATAAGCCCCGGCTAATTACGTGCCAGCAGCCGCGGTAACA | 480 |
|                       | *****                                                        |     |
| TP_TPANICr0001_16RNA1 | CGTAAGGGGCGAGCGTTGTCGGAATTATTTGGGCGTAAAGGGCATGCAGGCGGACTGGTA | 540 |
| OS-18-VID15_16sRNA    | CGTAAGGGGCGAGCGTTGTCGGAATTATTTGGGCGTAAAGGGCATGCAGGCGGACTGGTA | 540 |
| OS-4_16sRNA           | CGTAAGGGGCGAGCGTTGTCGGAATTATTTGGGCGTAAAGGGCATGCAGGCGGACTGGTA | 540 |
| OS-12-VID15_16sRNA    | CGTAAGGGGCGAGCGTTGTCGGAATTATTTGGGCGTAAAGGGCATGCAGGCGGACTGGTA | 540 |
|                       | *****                                                        |     |
| TP_TPANICr0001_16RNA1 | AGCCTGGTGTGAAATCCCCGAGCTCAACTTGGGAACTGCACTGGGTACTGCTGGTCTAGA | 600 |
| OS-18-VID15_16sRNA    | AGCCTGGTGTGAAATCCCCGAGCTCAACTTGGGAACTGCACTGGGTACTGCTGGTCTAGA | 600 |
| OS-4_16sRNA           | AGCCTGGTGTGAAATCCCCGAGCTCAACTTGGGAACTGCACTGGGTACTGCTGGTCTAGA | 600 |
| OS-12-VID15_16sRNA    | AGCCTGGTGTGAAATCCCCGAGCTCAACTTGGGAACTGCACTGGGTACTGCTGGTCTAGA | 600 |
|                       | *****                                                        |     |
| TP_TPANICr0001_16RNA1 | ATCACGGAGGGGAAACCGGAATTCCAAGTGTAGGGGTGGAATCTGTAGATATTTGGAAGA | 660 |
| OS-18-VID15_16sRNA    | ATCACGGAGGGGAAACCGGAATTCCAAGTGTAGGGGTGGAATCTGTAGATATTTGGAAGA | 660 |
| OS-4_16sRNA           | ATCACGGAGGGGAAACCGGAATTCCAAGTGTAGGGGTGGAATCTGTAGATATTTGGAAGA | 660 |
| OS-12-VID15_16sRNA    | ATCACGGAGGGGAAACCGGAATTCCAAGTGTAGGGGTGGAATCTGTAGATATTTGGAAGA | 660 |
|                       | *****                                                        |     |

|                       |                                                               |      |
|-----------------------|---------------------------------------------------------------|------|
| TP_TPANICr0001_16RNA1 | ACACCGGTGGCGAAGCGGGTTTCTGGCCGATGATTGACGCTGAGGTGCGAAGGTGTGGG   | 720  |
| OS-18-VID15_16sRNA    | ACACCGGTGGCGAAGCGGGTTTCTGGCCGATGATTGACGCTGAGGTGCGAAGGTGTGGG   | 720  |
| OS-4_16sRNA           | ACACCGGTGGCGAAGCGGGTTTCTGGCCGATGATTGACGCTGAGGTGCGAAGGTGTGGG   | 720  |
| OS-12-VID15_16sRNA    | ACACCGGTGGCGAAGCGGGTTTCTGGCCGATGATTGACGCTGAGGTGCGAAGGTGTGGG   | 720  |
| *****                 |                                                               |      |
| TP_TPANICr0001_16RNA1 | GAGCGAACAGGATTAGATACCCTGGTAGTCCACACAGTAAACGATGTACACTAGGTGTGTG | 780  |
| OS-18-VID15_16sRNA    | GAGCGAACAGGATTAGATACCCTGGTAGTCCACACAGTAAACGATGTACACTAGGTGTGTG | 780  |
| OS-4_16sRNA           | GAGCGAACAGGATTAGATACCCTGGTAGTCCACACAGTAAACGATGTACACTAGGTGTGTG | 780  |
| OS-12-VID15_16sRNA    | GAGCGAACAGGATTAGATACCCTGGTAGTCCACACAGTAAACGATGTACACTAGGTGTGTG | 780  |
| *****                 |                                                               |      |
| TP_TPANICr0001_16RNA1 | GGGCATGAGTCTCGGCGCCGACGCGAACGCATTAAGTGTACCGCTGGGGAGTATGCTCG   | 840  |
| OS-18-VID15_16sRNA    | GGGCATGAGTCTCGGCGCCGACGCGAACGCATTAAGTGTACCGCTGGGGAGTATGCTCG   | 840  |
| OS-4_16sRNA           | GGGCATGAGTCTCGGCGCCGACGCGAACGCATTAAGTGTACCGCTGGGGAGTATGCTCG   | 840  |
| OS-12-VID15_16sRNA    | GGGCATGAGTCTCGGCGCCGACGCGAACGCATTAAGTGTACCGCTGGGGAGTATGCTCG   | 840  |
| *****                 |                                                               |      |
| TP_TPANICr0001_16RNA1 | CAAGAGTGAAACTCAAAGGAATTGACGGGGGCCCGCACAAAGCGGTGGAGCATGTGGTTTA | 900  |
| OS-18-VID15_16sRNA    | CAAGAGTGAAACTCAAAGGAATTGACGGGGGCCCGCACAAAGCGGTGGAGCATGTGGTTTA | 900  |
| OS-4_16sRNA           | CAAGAGTGAAACTCAAAGGAATTGACGGGGGCCCGCACAAAGCGGTGGAGCATGTGGTTTA | 900  |
| OS-12-VID15_16sRNA    | CAAGAGTGAAACTCAAAGGAATTGACGGGGGCCCGCACAAAGCGGTGGAGCATGTGGTTTA | 900  |
| *****                 |                                                               |      |
| TP_TPANICr0001_16RNA1 | ATTCGATGATACGCGAGGAACCTTACCGGGTTTGACATCAAGAGGAGCGCCGTAGAAAT   | 960  |
| OS-18-VID15_16sRNA    | ATTCGATGATACGCGAGGAACCTTACCGGGTTTGACATCAAGAGGAGCGCCGTAGAAAT   | 960  |
| OS-4_16sRNA           | ATTCGATGATACGCGAGGAACCTTACCGGGTTTGACATCAAGAGGAGCGCCGTAGAAAT   | 960  |
| OS-12-VID15_16sRNA    | ATTCGATGATACGCGAGGAACCTTACCGGGTTTGACATCAAGAGGAGCGCCGTAGAAAT   | 960  |
| *****                 |                                                               |      |
| TP_TPANICr0001_16RNA1 | GCGGTGGCGTAGCGATACGCCTCTTGACAGGTGCTGCATGGCTGTCGTCAGCTCGTGCCG  | 1020 |
| OS-18-VID15_16sRNA    | GCGGTGGCGTAGCGATACGCCTCTTGACAGGTGCTGCATGGCTGTCGTCAGCTCGTGCCG  | 1020 |
| OS-4_16sRNA           | GCGGTGGCGTAGCGATACGCCTCTTGACAGGTGCTGCATGGCTGTCGTCAGCTCGTGCCG  | 1020 |
| OS-12-VID15_16sRNA    | GCGGTGGCGTAGCGATACGCCTCTTGACAGGTGCTGCATGGCTGTCGTCAGCTCGTGCCG  | 1020 |
| *****                 |                                                               |      |
| TP_TPANICr0001_16RNA1 | TGAGGTGTTGGGTTAAGTCCCGCAACGAGCGCAACCCCTACTGCCAGTTGCCAGCAAGTG  | 1080 |
| OS-18-VID15_16sRNA    | TGAGGTGTTGGGTTAAGTCCCGCAACGAGCGCAACCCCTACTGCCAGTTGCCAGCAAGTG  | 1080 |
| OS-4_16sRNA           | TGAGGTGTTGGGTTAAGTCCCGCAACGAGCGCAACCCCTACTGCCAGTTGCCAGCAAGTG  | 1080 |
| OS-12-VID15_16sRNA    | TGAGGTGTTGGGTTAAGTCCCGCAACGAGCGCAACCCCTACTGCCAGTTGCCAGCAAGTG  | 1080 |
| *****                 |                                                               |      |
| TP_TPANICr0001_16RNA1 | GTGTTGGGGACTCTGGCGGAACCTGCCGGTGACAAACCGGAGGAAGGTGGGGATGACGTCA | 1140 |
| OS-18-VID15_16sRNA    | GTGTTGGGGACTCTGGCGGAACCTGCCGGTGACAAACCGGAGGAAGGTGGGGATGACGTCA | 1140 |
| OS-4_16sRNA           | GTGTTGGGGACTCTGGCGGAACCTGCCGGTGACAAACCGGAGGAAGGTGGGGATGACGTCA | 1140 |
| OS-12-VID15_16sRNA    | GTGTTGGGGACTCTGGCGGAACCTGCCGGTGACAAACCGGAGGAAGGTGGGGATGACGTCA | 1140 |
| *****                 |                                                               |      |
| TP_TPANICr0001_16RNA1 | AGTCATCATGGCCCTTATGTCCGGGGCTACACACGTGCTACAATGGTTGCTACAGAGCGA  | 1200 |
| OS-18-VID15_16sRNA    | AGTCATCATGGCCCTTATGTCCGGGGCTACACACGTGCTACAATGGTTGCTACAGAGCGA  | 1200 |
| OS-4_16sRNA           | AGTCATCATGGCCCTTATGTCCGGGGCTACACACGTGCTACAATGGTTGCTACAGAGCGA  | 1200 |
| OS-12-VID15_16sRNA    | AGTCATCATGGCCCTTATGTCCGGGGCTACACACGTGCTACAATGGTTGCTACAGAGCGA  | 1200 |
| *****                 |                                                               |      |
| TP_TPANICr0001_16RNA1 | TGCGAGGTTGTGAAGTGGAGCAAACCGCAAAAAGGCAATCGTAGTCCGGATTGAAGTCTG  | 1260 |
| OS-18-VID15_16sRNA    | TGCGAGGTTGTGAAGTGGAGCAAACCGCAAAAAGGCAATCGTAGTCCGGATTGAAGTCTG  | 1260 |
| OS-4_16sRNA           | TGCGAGGTTGTGAAGTGGAGCAAACCGCAAAAAGGCAATCGTAGTCCGGATTGAAGTCTG  | 1260 |
| OS-12-VID15_16sRNA    | TGCGAGGTTGTGAAGTGGAGCAAACCGCAAAAAGGCAATCGTAGTCCGGATTGAAGTCTG  | 1260 |
| *****                 |                                                               |      |
| TP_TPANICr0001_16RNA1 | AAACTCGACTTCATGAAGTTGGAATCGCTAGTAATCGCACATCAGCATGGTGCAGTGAAT  | 1320 |
| OS-18-VID15_16sRNA    | AAACTCGACTTCATGAAGTTGGAATCGCTAGTAATCGCACATCAGCATGGTGCAGTGAAT  | 1320 |
| OS-4_16sRNA           | AAACTCGACTTCATGAAGTTGGAATCGCTAGTAATCGCACATCAGCATGGTGCAGTGAAT  | 1320 |
| OS-12-VID15_16sRNA    | AAACTCGACTTCATGAAGTTGGAATCGCTAGTAATCGCACATCAGCATGGTGCAGTGAAT  | 1320 |
| *****                 |                                                               |      |
| TP_TPANICr0001_16RNA1 | GTGTTCCCGGGCCTTGTACACACCGCCCGTACACCATCCGAGTTGGAGATACCCGAAGT   | 1380 |
| OS-18-VID15_16sRNA    | GTGTTCCCGGGCCTTGTACACACCGCCCGTACACCATCCGAGTTGGAGATACCCGAAGT   | 1380 |
| OS-4_16sRNA           | GTGTTCCCGGGCCTTGTACACACCGCCCGTACACCATCCGAGTTGGAGATACCCGAAGT   | 1380 |
| OS-12-VID15_16sRNA    | GTGTTCCCGGGCCTTGTACACACCGCCCGTACACCATCCGAGTTGGAGATACCCGAAGT   | 1380 |
| *****                 |                                                               |      |

|                       |                                                              |      |
|-----------------------|--------------------------------------------------------------|------|
| TP_TPANICr0001_16RNA1 | CACTAGCCTAACCCGCAAGGGAGGGCGGTGCCGAAGGTATGTTTGGTAAGGAGGGTGAAG | 1440 |
| OS-18-VID15_16sRNA    | CACTAGCCTAACCCGCAAGGGAGGGCGGTGCCGAAGGTATGTTTGGTAAGGAGGGTGAAG | 1440 |
| OS-4_16sRNA           | CACTAGCCTAACCCGCAAGGGAGGGCGGTGCCGAAGGTATGTTTGGTAAGGAGGGTGAAG | 1440 |
| OS-12-VID15_16sRNA    | CACTAGCCTAACCCGCAAGGGAGGGCGGTGCCGAAGGTATGTTTGGTAAGGAGGGTGAAG | 1440 |
|                       | *****                                                        |      |

|                       |                                                          |      |
|-----------------------|----------------------------------------------------------|------|
| TP_TPANICr0001_16RNA1 | TCGTAACAAGGTAGCCGTACCGGAAGGTGCGGCTGGATCACCTCCTTTCTAAGAGA | 1496 |
| OS-18-VID15_16sRNA    | TCGTAACAAGGTAGCCGTACCGGAAGGTGCGGCTGGATCACCTCCTTTCTAAGAGA | 1496 |
| OS-4_16sRNA           | TCGTAACAAGGTAGCCGTACCGGAAGGTGCGGCTGGATCACCTCCTTTCTAAGAGA | 1496 |
| OS-12-VID15_16sRNA    | TCGTAACAAGGTAGCCGTACCGGAAGGTGCGGCTGGATCACCTCCTTTCTAAGAGA | 1496 |
|                       | *****                                                    |      |
