# Supplementary material
Source: PubMed Central journal article supplement (PMC11448083)
Supplement: spectrum.00581-24-s0003.pdf [file spectrum.00581-24-s0003.pdf]

Supplementary Table 1. Distribution of *T. pallidum polA* PCR results by RPR titer (n=53)

| RPR Titer        | <i>polA</i> PCR positive |                | <i>polA</i> PCR negative |                |
|------------------|--------------------------|----------------|--------------------------|----------------|
|                  | No. of sera (%)          | Cumulative (%) | No. of sera (%)          | Cumulative (%) |
| Non-reactive     | 0 (0)                    | 0 (0)          | 1 (3)                    | 1 (3)          |
| R1 (undiluted)   | 1 (7)                    | 1 (7)          | 2 (5)                    | 3 (8)          |
| R2 (1:2)         | 1 (7)                    | 2 (13)         | 1 (3)                    | 4 (11)         |
| R4 (1:4)         | 1 (7)                    | 3 (20)         | 0 (0)                    | 4 (11)         |
| R8 (1:8)         | 0 (0)                    | 3 (20)         | 1 (3)                    | 5 (13)         |
| R32 (1:32)       | 0 (0)                    | 3 (20)         | 2 (5)                    | 7 (18)         |
| R64 (1:64)       | 0 (0)                    | 3 (20)         | 7 (19)                   | 14 (37)        |
| R128 (1:128)     | 5 (33)                   | 8 (53)         | 8 (22)                   | 22 (58)        |
| R256 (1:256)     | 2 (13)                   | 10 (67)        | 8 (22)                   | 30 (79)        |
| R512 (1:512)     | 3 (20)                   | 13 (87)        | 1 (3)                    | 31 (82)        |
| R1024 (1:1024)   | 0 (0)                    | 13 (87)        | 2 (5)                    | 33 (87)        |
| R2048 (1:2048)   | 1 (7)                    | 14 (93)        | 4 (11)                   | 37 (97)        |
| R4096 (1:4096)   | 0 (0)                    | 14 (93)        | 1 (3)                    | 38 (100)       |
| R65536 (1:65536) | 1 (7)                    | 15 (100)       | 0 (0)                    | 38 (100)       |

Abbreviations: PCR, polymerase chain reaction; RPR, rapid plasma regain; R, reactive
