# Supplementary material
Source: PubMed Central journal article supplement (PMC11448083)
Supplement: spectrum.00581-24-s0004.pdf [file spectrum.00581-24-s0004.pdf]

Supplementary Table 2. Distribution of *T. pallidum polA* PCR results by CSF-VDRL titer (n=39)

| CSF-VDRL Titer | <i>polA</i> PCR positive |                | <i>polA</i> PCR negative |                |
|----------------|--------------------------|----------------|--------------------------|----------------|
|                | No. of sera (%)          | Cumulative (%) | No. of sera (%)          | Cumulative (%) |
| Non-reactive   | 2 (14)                   | 2 (14)         | 15 (60)                  | 15 (60)        |
| R1 (undiluted) | 5 (36)                   | 7 (50)         | 5 (20)                   | 20 (80)        |
| R2 (1:2)       | 4 (29)                   | 11 (79)        | 3 (12)                   | 23 (92)        |
| R4 (1:4)       | 2 (14)                   | 13 (93)        | 0 (0)                    | 23 (92)        |
| R8 (1:8)       | 1 (7)                    | 14 (100)       | 1 (4)                    | 24 (96)        |
| R64 (1:64)     | 0 (0)                    | 14 (100)       | 1 (4)                    | 25 (100)       |

Abbreviations: CSF, cerebrospinal fluid; PCR, polymerase chain reaction; R, reactive; VDRL, Venereal disease research laboratory
