# Supplementary material
Source: PubMed Central journal article supplement (PMC11448083)
Supplement: spectrum.00581-24-s0005.pdf [file spectrum.00581-24-s0005.pdf]

Supplementary Table 3: Whole genome sequencing statistics for ocular syphilis strains

| Specimen ID | Sequencing platform | Mean depth of sequencing coverage | Percentage of the reference <sup>a</sup> covered with $\geq 5$ reads | Percentage of the reference <sup>a</sup> covered with $\geq 3$ reads | Percentage of the reference <sup>a</sup> covered with $\geq 1$ read |
|-------------|---------------------|-----------------------------------|----------------------------------------------------------------------|----------------------------------------------------------------------|---------------------------------------------------------------------|
| OS-4-B      | MiSeq + NovaSeq     | 341.98                            | 76.3221                                                              | 79.55008                                                             | 84.46027                                                            |
| OS-12-VF    | MiSeq               | 3232.37                           | 98.71118                                                             | 98.73461                                                             | 98.7626                                                             |
| OS-12-CSF   | NovaSeq             | 2636.93                           | 91.15104                                                             | 92.31806                                                             | 94.25511                                                            |
| OS-18-VF    | MiSeq               | 1997.32                           | 97.53275                                                             | 98.03829                                                             | 98.60219                                                            |

Abbreviations: B, blood; CSF, cerebrospinal fluid; VF, vitreous fluid

<sup>a</sup>*T. pallidum* subsp. *pallidum* SS14 reference genome (GenBank version number [NC\\_021508.1](#)).
