# Supplementary material
Source: PubMed Central journal article supplement (PMC11448083)
Supplement: spectrum.00581-24-s0007.pdf [file spectrum.00581-24-s0007.pdf]

Supplementary Table 5. Results of the pairwise comparison of recovered ACDCT and MLST genes from the WGS data for each *T. pallidum* specimen

| Specimen ID | MLST and other Typing genes recovered with $\geq$ 70% coverage to the reference gene | Percentage of sequence similarity <sup>a</sup> compared to the reference gene (MLST allele <sup>b</sup> ) |
|-------------|--------------------------------------------------------------------------------------|-----------------------------------------------------------------------------------------------------------|
| OS-12-CSF   | <i>rpsA</i>                                                                          | 100%                                                                                                      |
|             | <i>tp0136</i>                                                                        | X <sup>c</sup>                                                                                            |
|             | <i>tp0548</i>                                                                        | 100% (1)                                                                                                  |
|             | <i>tp0705</i>                                                                        | 100% (1)                                                                                                  |
| OS-12-VF    | <i>rpsA</i>                                                                          | 99.96%                                                                                                    |
|             | <i>tprG</i>                                                                          | 99.91%                                                                                                    |
|             | 16S rRNA                                                                             | 100%                                                                                                      |
|             | 23S rRNA                                                                             | 100%                                                                                                      |
|             | <i>tp0136</i>                                                                        | 100% (19)                                                                                                 |
|             | <i>tp0548</i>                                                                        | 100% (1)                                                                                                  |
|             | <i>tp0705</i>                                                                        | 100% (1)                                                                                                  |
| OS-4-B      | 16S rRNA                                                                             | 100%                                                                                                      |
|             | 23S rRNA                                                                             | 100%                                                                                                      |
|             | <i>tp0548</i>                                                                        | 100% (3)                                                                                                  |
| OS-18-VF    | <i>tprJ</i>                                                                          | 100%                                                                                                      |
|             | 16S RNA                                                                              | 100%                                                                                                      |
|             | <i>tp0136</i>                                                                        | 99.89% (6 <sup>d</sup> )                                                                                  |
|             | <i>tp0548</i>                                                                        | 100% (3)                                                                                                  |
|             | <i>tp0705</i>                                                                        | 100% (1)                                                                                                  |

Abbreviations: ACDCT, augmented CDC typing system; B, blood; CSF, cerebrospinal; VF, vitreous fluid.

<sup>a</sup>Sequence percent similarity was determined from the *de novo* assemblies using BLAST

<sup>b</sup>MLST alleles were determined by SRSRT2 using *T. pallidum* short read sequences

<sup>c</sup>MLST allelic profile for *tp0136* could not be determined

<sup>d</sup>Closest match for *tp0136* was to allele 6 with 1 indel mutation
